# Supplementary material for: Ligilactobacillus salivarius PS2 Supplementation during Pregnancy and Lactation Prevents Mastitis: A Randomised Controlled Trial
Source: MDPI journal article supplement (doi:10.3390/microorganisms9091933), 2021-09-11
Supplement: s1 [file s1]

## Supporting Information

**Supporting Information Table S1. Exclusion criteria for women participating in the study.**

| Exclusion criteria for women participating in the study                                                                                                                                                                                                                                                                                                                                                                                                                                                                                                                                                                                                                                                                                                                                                                                                                                                                                                                                                                                                                                                                                                                                                                                                                                                                                                                                                                                                              |
|----------------------------------------------------------------------------------------------------------------------------------------------------------------------------------------------------------------------------------------------------------------------------------------------------------------------------------------------------------------------------------------------------------------------------------------------------------------------------------------------------------------------------------------------------------------------------------------------------------------------------------------------------------------------------------------------------------------------------------------------------------------------------------------------------------------------------------------------------------------------------------------------------------------------------------------------------------------------------------------------------------------------------------------------------------------------------------------------------------------------------------------------------------------------------------------------------------------------------------------------------------------------------------------------------------------------------------------------------------------------------------------------------------------------------------------------------------------------|
| <ol style="list-style-type: none"><li>1) Pre-gravid body mass index (BMI)&lt;18 or &gt;30;</li><li>2) Use of probiotic supplements during the third trimester of current pregnancy<sup>1</sup>;</li><li>3) Enhanced chance of premature delivery (before 37 weeks + 0 days of gestation);</li><li>4) Current or previous illnesses which could interfere with the study, like other mammary pathologies (e.g. abscesses, Raynaud's syndrome, breast cancer);</li><li>5) Short bowel syndrome;</li><li>6) Impaired intestinal epithelial barrier (e.g. diarrheal illness, intestinal inflammation);</li><li>7) Serious underlying disease predisposing to infection (e.g. HIV, auto-immune diabetes, multiple organ failure, malignancy, severe burns, severe acute pancreatitis);</li><li>8) Heart failure and cardiac medical history (e.g. artificial heart valve, medical history of infectious endocarditis, rheumatic fever and cardiac malformation);</li><li>9) History of aggressive immunosuppressive therapy (e.g. radiotherapy, cancer chemotherapy);</li><li>10) Traumatic injury of the gastrointestinal tract;</li><li>11) Surgery, including dental surgery, within one month prior to inclusion (Visit 1);</li><li>12) Investigator's uncertainty about the willingness/ability of the subject to comply with protocol requirements;</li><li>13) Participation in any other clinical trial within two weeks prior to entry into the study.</li></ol> |

<sup>1</sup>Criterion referred to products (supplements) that are bought in the pharmacy and/or health drug store. It did not involve food product supplemented with 'live bacteria'.

**Supporting Information Table S2. Hazard ratio of incidence of mastitis between study groups (mITT)**

|                                     | <b>Placebo<br/>(N=144)</b> | <b>Probiotic (N=156)</b> | <b>P-value</b> |
|-------------------------------------|----------------------------|--------------------------|----------------|
| Mastitis incidence                  |                            |                          |                |
| No, n (%)                           | 124 (86.1%)                | 147 (94.2%)              |                |
| Yes, n (%)                          | 20 (13.9%)                 | 9 (5.8%)                 |                |
| Age adjusted HR (CI) <sup>†</sup>   | 1.000                      | 0.415 (0.189-0.912)      | 0.0285         |
| Fully adjusted HR (CI) <sup>‡</sup> | 1.000                      | 0.352 (0.156-0.793)      | 0.0117         |
| Fully adjusted HR (CI) <sup>§</sup> | 1.000                      | 0.417 (0.190-0.915)      | 0.0293         |

N=Number of subjects of the analysis population, [n]=number of subjects per category.  
HR=Hazard Ratio, CI=Confidence Interval

<sup>†</sup>Cox PH regression model stratified by sub-site and includes study group and age at delivery as covariates.

<sup>‡</sup>Fully adjusted Cox PH regression model, adding the following potential covariates to the model: use of antibiotics, type of delivery, number of previous breastfed infants, duration of breastfeeding, breastfeeding stop, previous mastitis, and duration of study product intake before delivery.

<sup>§</sup>Fully adjusted Cox PH regression model, adding the potential covariates and applying backward selection.

**Supporting Information Table S3. Duration of partial (mixed with formula feeding) and exclusive breastfeeding (mITT)<sup>†</sup>**

|                                                                       |            | <b>Placebo<br/>(N=144)</b> | <b>Probiotics<br/>(N=156)</b> | <b>P-value*</b> |
|-----------------------------------------------------------------------|------------|----------------------------|-------------------------------|-----------------|
| Duration of any breastfeeding<br>(including mixed), days <sup>‡</sup> | n (n miss) | 137 (7)                    | 151 (5)                       |                 |
|                                                                       | Mean (SD)  | 77.2 (19.6)                | 77.3 (19.2)                   |                 |
|                                                                       | Median     | 84.0                       | 83.0                          | 0.765           |
|                                                                       | (Q1, Q3)   | (79.0, 86.0)               | (80.0, 85.0)                  |                 |
|                                                                       | Min - Max  | 5.0 - 104.0                | 5.0 - 105.0                   |                 |
| Duration of exclusive<br>breastfeeding, days <sup>§</sup>             | n (n miss) | 137 (7)                    | 151 (5)                       |                 |
|                                                                       | Mean (SD)  | 61.6 (29.8)                | 58.1 (32.6)                   |                 |
|                                                                       | Median     | 77.0                       | 76.0                          | 0.559           |
|                                                                       | (Q1, Q3)   | (41.0, 83.0)               | (30.0, 83.0)                  |                 |
|                                                                       | Min - Max  | 0.0 - 103.0                | 0.0 - 99.0                    |                 |

\* P-value of Mann-Whitney U-test

N=number of subjects of the analysis population, n=number of subjects per category, n miss=number of missing values per category, SD=Standard Deviation, Q1, Q3=Quartile1, Quartile 3

<sup>†</sup>) Data collection was limited to the 12-week follow-up of subjects. If subjects were still breastfeeding at the last visit this was recorded as the end of the breastfeeding period

<sup>‡</sup> Duration of any breastfeeding (including mixed) was calculated as: date of last breastfeeding - date of delivery.

<sup>§</sup> Duration of exclusive breastfeeding was calculated as: date of last breastfeeding – date of delivery - number of days with formula feeding.
